# Supplementary material
Source: PubMed Central journal article supplement (PMC4882441)
Supplement: 10.1074_M116.725358_jbc.M116.725358-1.pdf [file 10.1074_M116.725358_jbc.M116.725358-1.pdf]

# DNA Polymerase III, but not Polymerase IV, Must be Bound to $\tau$ -Containing DnaX Complex to Enable Exchange into Replication Forks<sup>†</sup>

Quan Yuan, Paul R. Dohrmann, Mark D Sutton, Charles S McHenry

## Supplemental FIGURES

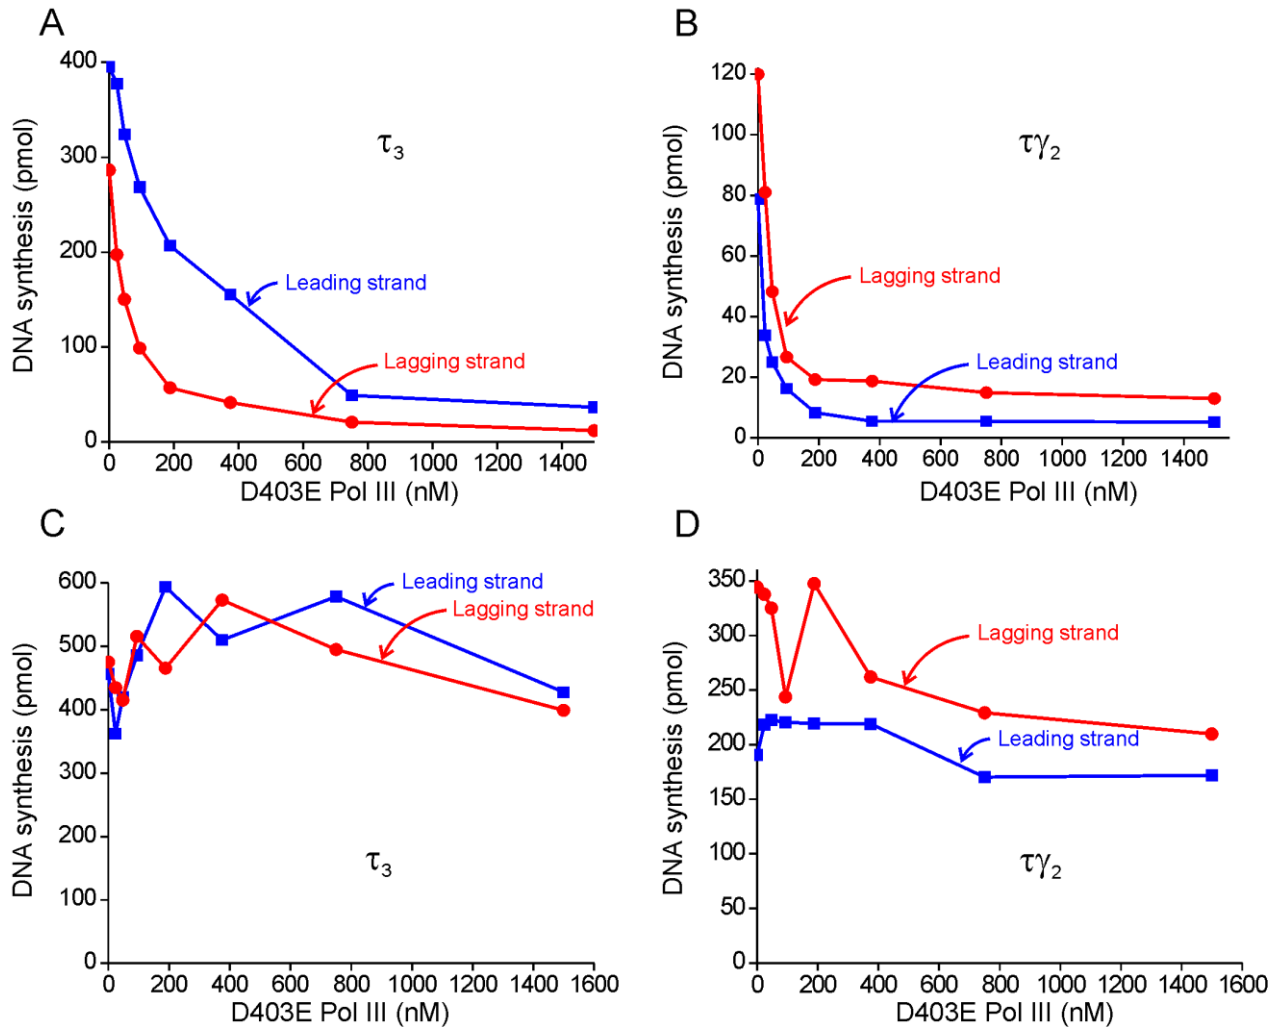

Supplementary FIGURE 1. **Pol III HE containing only one  $\tau$  is resistant to a D403E Pol III challenge.** (A,B) Protein components required for a rolling circle reaction were added to a pre-mixed solution of wild-type Pol III and D403E Pol III. After initiation complex formation, rolling circle replication reaction was started by the addition of 1 mM ATP, 100  $\mu$ M dNTPs, and  $\alpha$ -[<sup>32</sup>P]-dCTP/dGTP. (C,D) D403E Pol III was added to an ongoing rolling circle reaction. The composition of the DnaX complex in A,C is  $\tau_3$ . The composition of the DnaX complex in B,D is  $\tau_1\gamma_2$ .

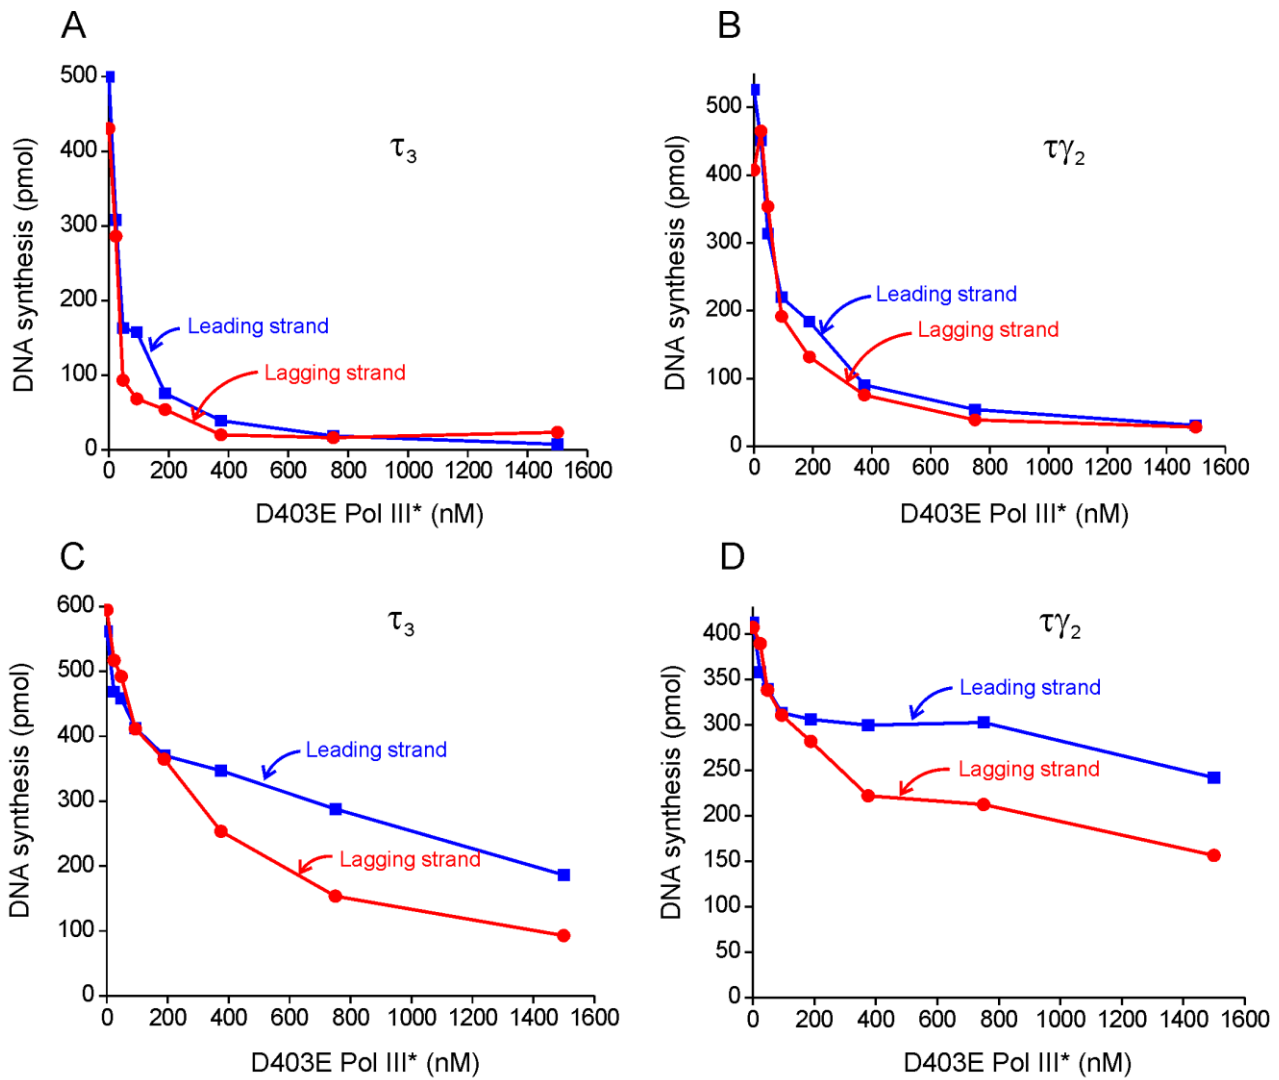

Supplementary FIGURE 2. **Pol III\* containing one or three  $\tau$  can exchange into the replication fork.** (A,B), Protein components required for a rolling circle reaction were added to a pre-mixed solution of wild-type Pol III\* and D403E Pol III\*. After initiation complex formation, rolling circle replication reaction was started by the addition of 1 mM ATP, 100  $\mu$ M dNTPs, and  $\alpha$ -[ $^{32}$ P]-dCTP/dGTP. (C,D), D403E Pol III\* was added to an ongoing rolling circle reaction. The composition of the DnaX complex in A,C is  $\tau_3$ . The composition of the DnaX complex in B,D is  $\tau_1\gamma_2$ .

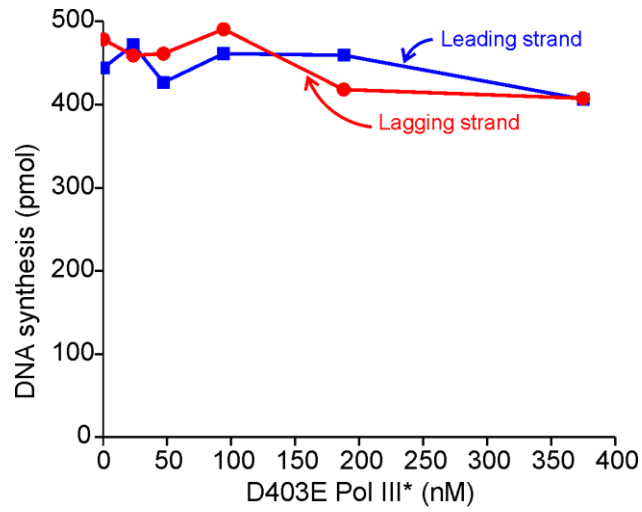

Supplementary FIGURE 3.  $\tau$  is required for Pol III\* exchange into the replication fork. D403E Pol III\*, with the composition of the DnaX complex  $\gamma_3$ , was added as challenge (0, 23.5, 47, 94, 188, 375 nM) to an ongoing rolling circle replication reaction containing WT Pol III\* (2.5 nM, DnaX composition  $\tau_2\gamma_1$ ). After initiation complex formation, rolling circle reaction was started by the addition of 1 mM ATP, 100  $\mu$ M dNTPs, and  $\alpha$ -[ $^{32}$ P]-dCTP or  $\alpha$ -[ $^{32}$ P]-dGTP.
